# Supplementary material for: Multivariant ligands stabilize anionic solvent-oriented α-CsPbX3nanocrystals at room temperature
Source: Royal Society of Chemistry journal article supplement (doi:10.1039/d0nr08697e), 2021-01-01
Supplement: d0nr08697e1.pdf [file d0nr08697e1.pdf]

## Supporting Information

### **Multivariant ligands stabilize anionic solvent-oriented $\alpha$ -CsPbX<sub>3</sub> nanocrystals at room temperature**

Yanqing Luo, <sup>[a, b]</sup> Tao Tan, <sup>[a, b]</sup> Sen Wang, <sup>[a, b]</sup> Ran Pang, <sup>[a]</sup> Lihong Jiang, <sup>[a]</sup> Da Li, <sup>[a]</sup>

Jing Feng, <sup>[a]</sup> Hongjie Zhang, <sup>[a]</sup> Su Zhang, <sup>\*[a]</sup> Chengyu Li, <sup>\*[a]</sup>

<sup>[a]</sup> State Key Laboratory of Rare Earth Resource Utilization, Changchun Institute of Applied Chemistry, Chinese Academy of Sciences, Changchun 130022, People's Republic of China

<sup>[b]</sup> University of Science and Technology of China, Hefei, 230026, People's Republic of China

\*Corresponding author. Email: cyli@ciac.ac.cn and zhangsu@ciac.ac.cn

#### **List of contents:**

1. Additional optical characterizations. (S1-S3).
2. NMR of CsPbX<sub>3</sub>. (S4-S5)
3. TEM of CsPbCl<sub>3</sub>. (S6)
4. Surface model of Ligands evolution. (S7)
5. Video Supplementary Information of CsPbX<sub>3</sub>.

Video S1 file for CsPbBr<sub>3</sub> (MP4)

Video S2 file for CsPbI<sub>3</sub> (MP4)

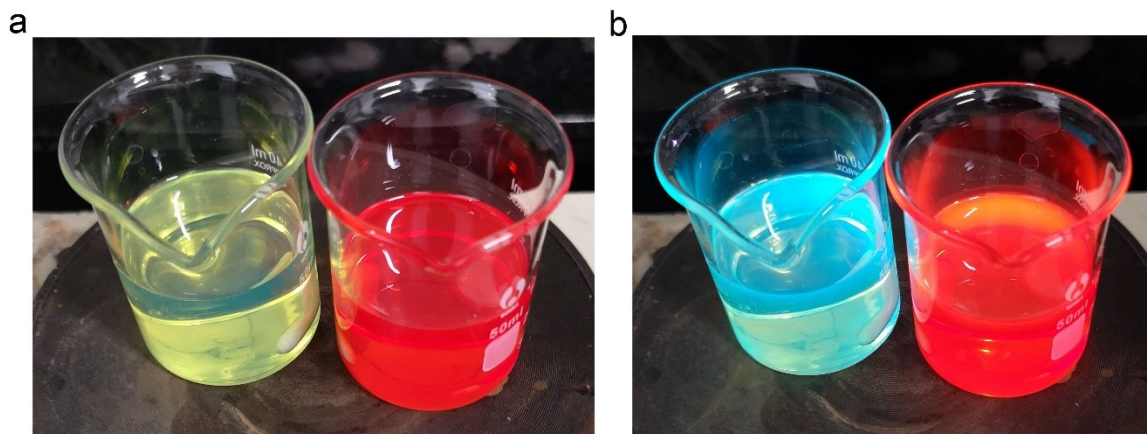

**Fig S1.** Temperature fluctuation effect. The  $\text{CsPbX}_3$  ( $\text{X} = \text{Br}, \text{I}$ ) were obtained in OA / OLA / toluene at R.T. (a) Photograph under daylight. (b) Photograph under 365 nm excitation after centrifuging for one minute at 4000 RPM (The heat produced by centrifugal process). The color of  $\text{CsPbBr}_3$  changes from sky-blue to cyan.

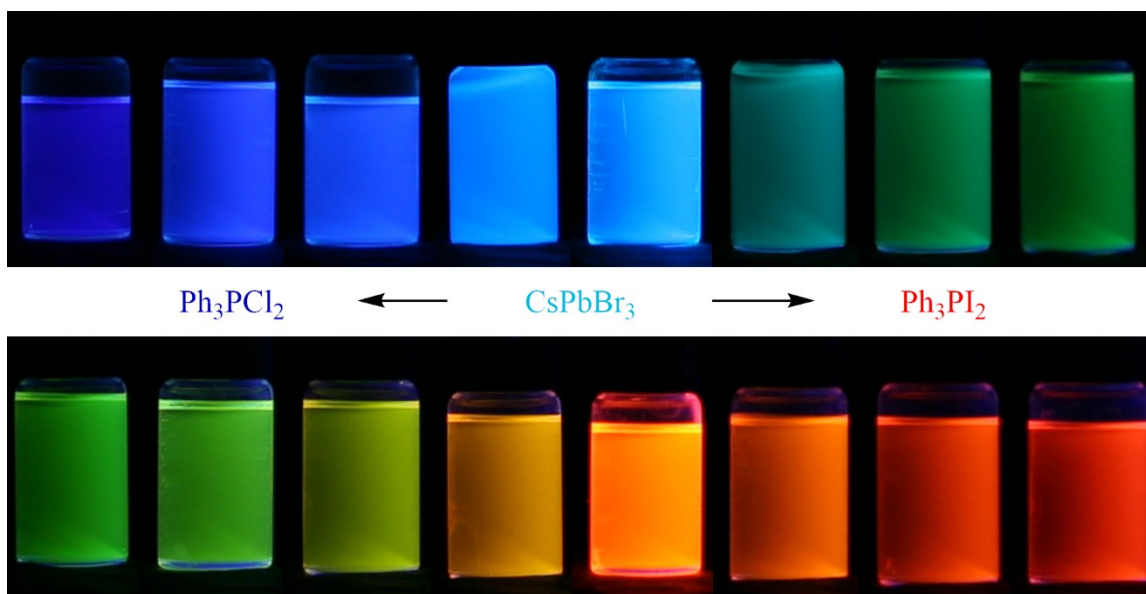

**Fig S2.** Ion exchange property. Rapid PL change at R.T. was induced by adding stoichiometric  $\text{Ph}_3\text{PCl}_2$  or  $\text{Ph}_3\text{PI}_3$  to  $\text{CsPbBr}_3$  solution. This exchange reaction was completed immediately by shaking mixture solution.

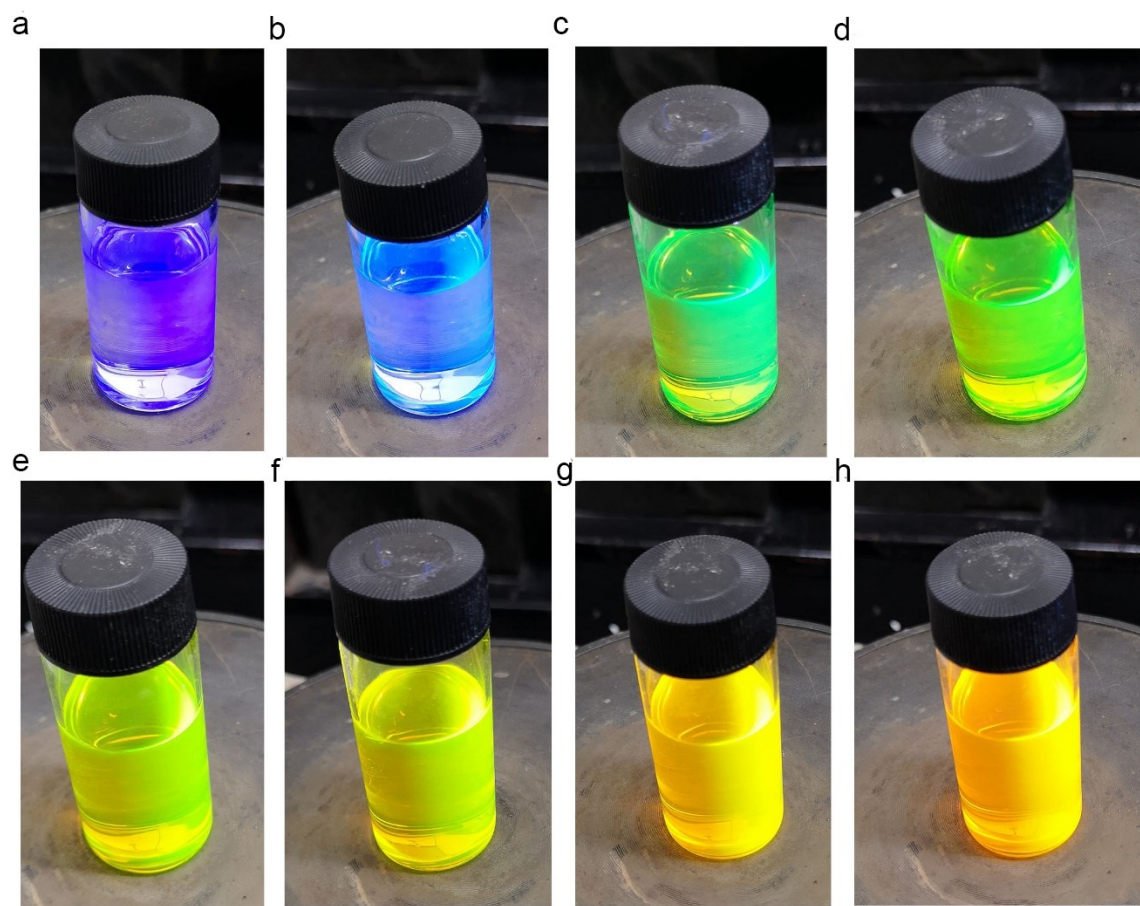

**Fig S3.** Ion exchange stability. The all  $\text{CsPbX}_3$  NCs were obtained in OA / OLA /  $\text{CH}_3\text{Cl}_3$  at R.T. Adding  $\text{Ph}_3\text{PCl}_2$  or  $\text{Ph}_3\text{PI}_2$  to optimized  $\text{CsPbBr}_3$  solution. (a)  $\text{CsPbCl}_3$  NCs. (b)  $\text{CsPbBr}_3$  NCs. (c-h)  $\text{CsPbBr}_{3-x}\text{I}_x$  NCs. All alloyed NCs show no fluorescence intensity reduction.

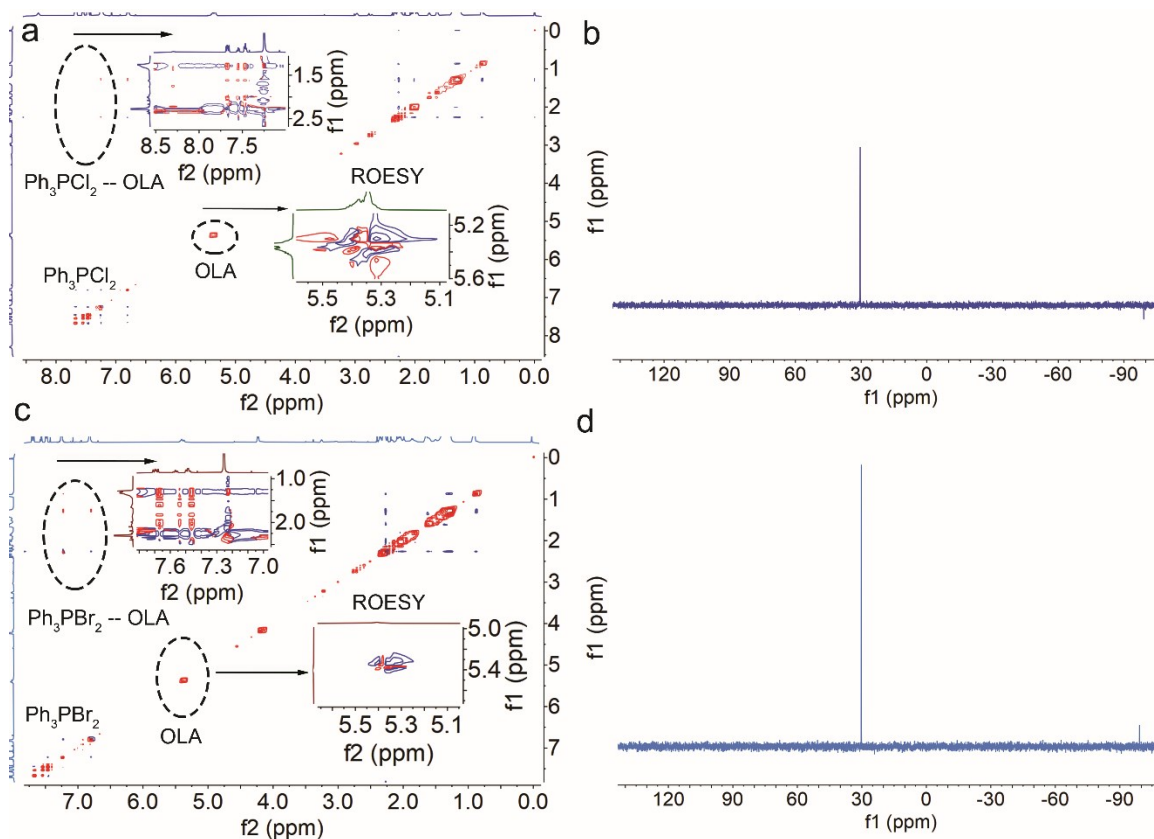

**Fig S4.** The ROESY characterized NCs were obtained in OA / OLA / Ph<sub>3</sub>P / C<sub>6</sub>Cl<sub>6</sub> / CD<sub>3</sub>Cl for CsPbCl<sub>3</sub> NCs at R.T. and in OA / OLA / CD<sub>3</sub>Cl for CsPbBr<sub>3</sub> NCs at R.T. Two-dimensional ROESY of the (a) CsPbCl<sub>3</sub> and (c) CsPbBr<sub>3</sub> NCs. <sup>31</sup>P-NMR of (b) CsPbCl<sub>3</sub> and (d) CsPbBr<sub>3</sub> NCs.

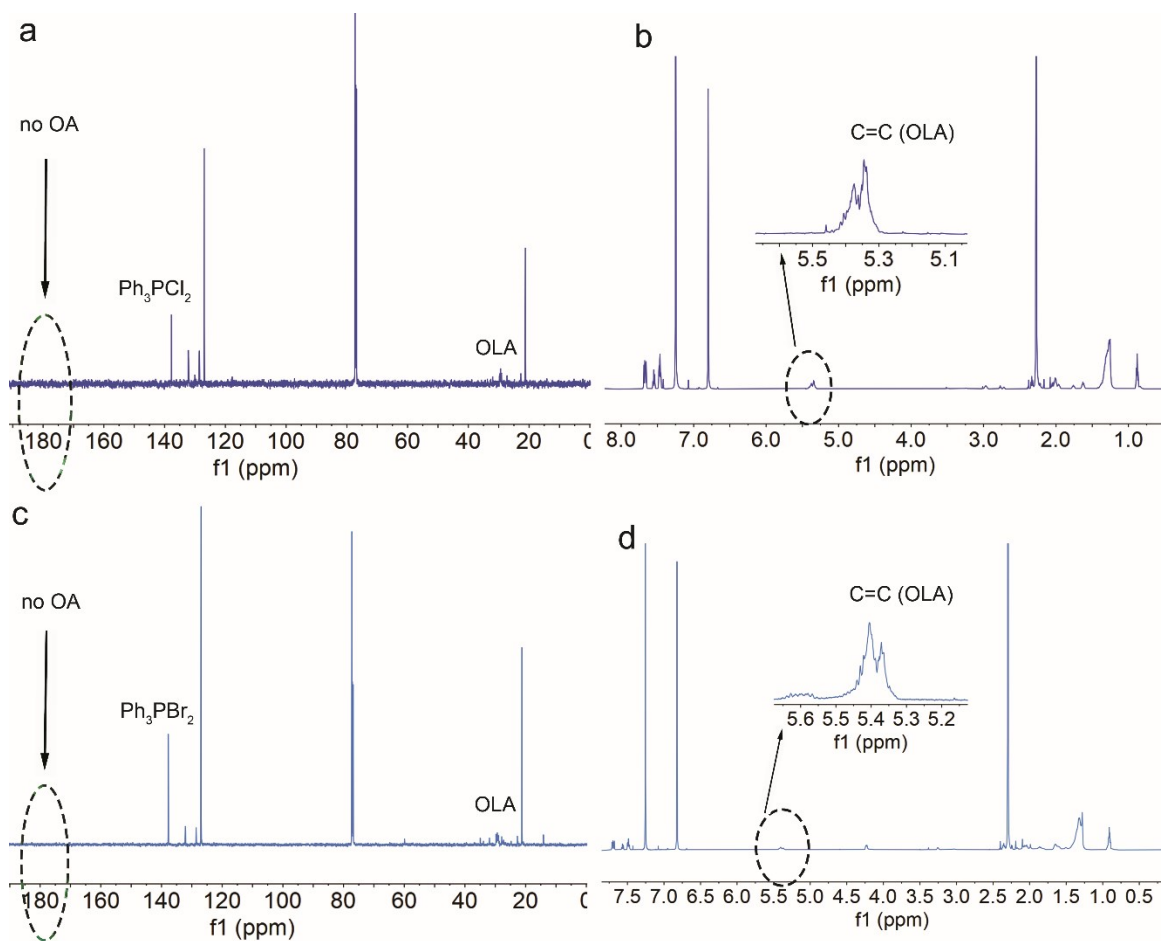

**Fig S5.** NMR characterized NCs were obtained in OA / OLA /  $\text{Ph}_3\text{P}$  /  $\text{C}_6\text{Cl}_6$  /  $\text{CD}_3\text{Cl}$  for  $\text{CsPbCl}_3$  NCs at R.T. and in OA / OLA /  $\text{CD}_3\text{Cl}$  for  $\text{CsPbBr}_3$  NCs at R.T.  $^{13}\text{C}$ -NMR spectrum of (a)  $\text{CsPbBr}_3$  NCs. (c)  $\text{CsPbCl}_3$  NCs.  $^1\text{H}$ -NMR spectrum of (b)  $\text{CsPbBr}_3$  NCs. (d).  $\text{CsPbCl}_3$  NCs. The top-right insert is  $^1\text{H}$ -NMR spectrum of OLA.



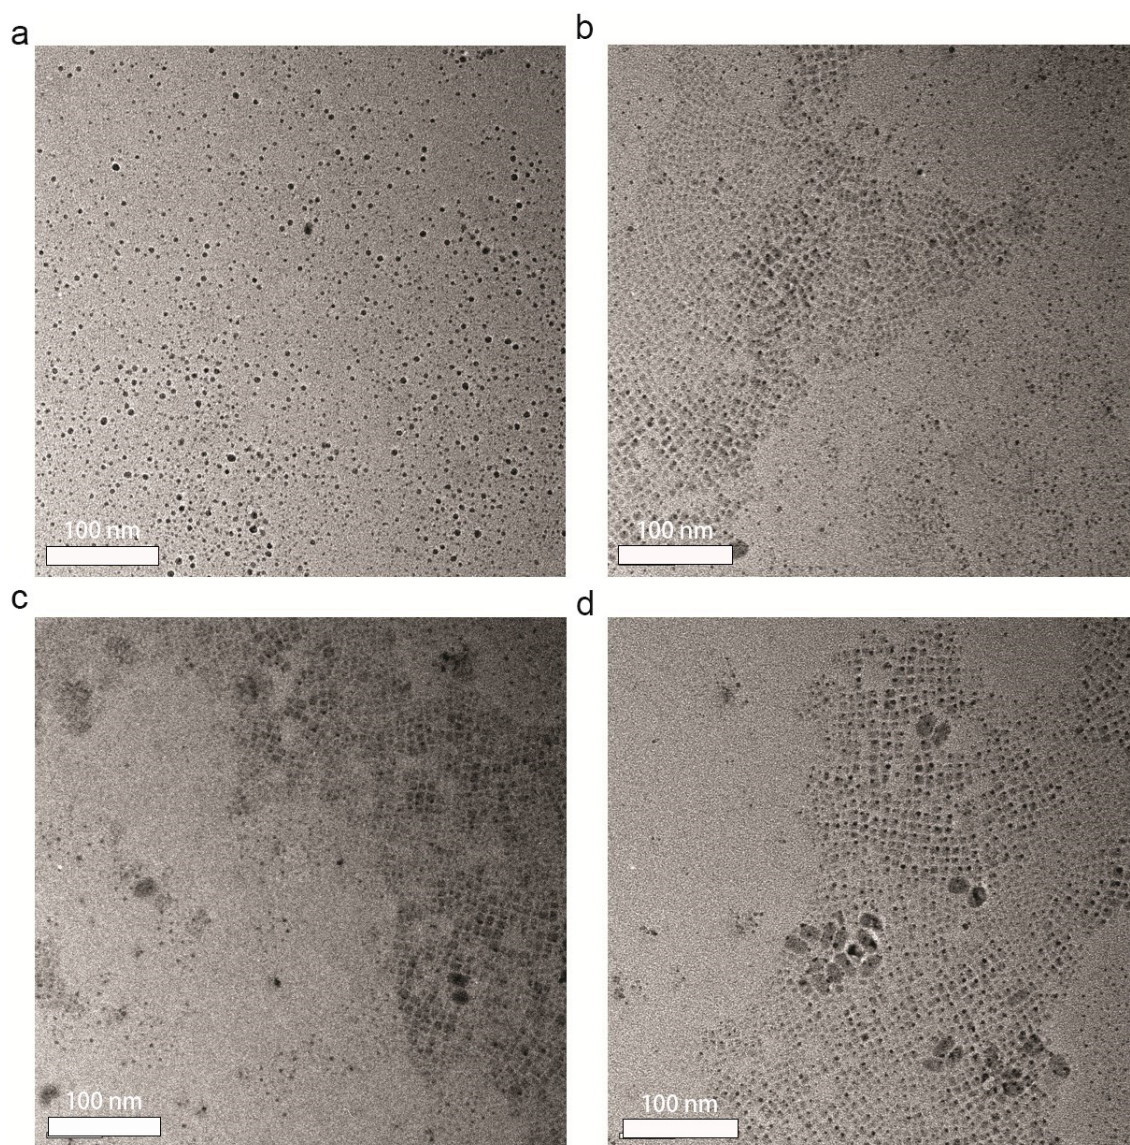

**Fig S6.** TEM of CsPbCl<sub>3</sub> NCs obtained in OA / OLA / Ph<sub>3</sub>P / C<sub>6</sub>Cl<sub>6</sub> / CD<sub>3</sub>Cl at different reaction time of (a) 5 min (b) 10 min. (c) 20 min. (d) 40 min. Morphology evolution from initial dotted shape to small square size indicates nucleation growth of CsPbCl<sub>3</sub> NCs. The scale bars are 100 nm.

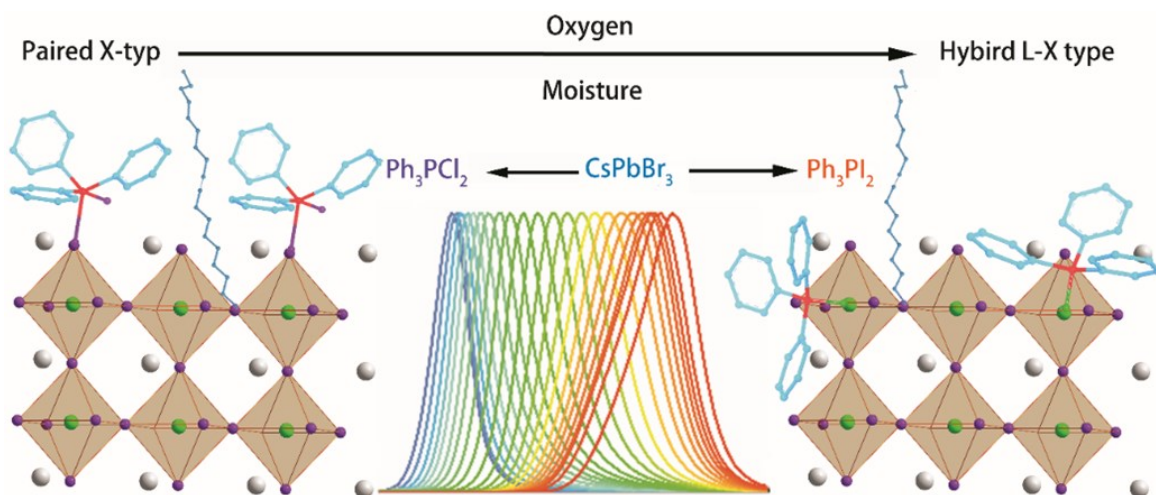

Fig S7. Ligands evolution model of  $\text{CsPbX}_3$  NCs. The initial ligands are paired-X-type ligands with  $\text{R-NH}_3^+$  and  $\text{Ph}_3\text{PX}_2$ . After destroyed by moisture, the surface ligands were hybrid L-X type with  $\text{R-NH}_3^+$  and  $\text{Ph}_3\text{PO}$ .



**Movie S1.** rapid synthesis of blue CsPbBr<sub>3</sub> NCs.

In a typical synthesis, metal precursor solution was dropped into CH<sub>3</sub>Cl (bromine was diluted in CH<sub>3</sub>Cl) at room temperature. The stirred solution immediately shows blue fluorescence.

**Movie S2.** rapid synthesis of orange CsPbI<sub>3</sub> NCs

In a typical synthesis, metal precursor solution was dropped into toluene (iodine was ultrasonically dissolved in toluene) at room temperature. The stirred solution immediately shows orange fluorescence.
